# Supplementary material for: M2-polarized macrophages contribute to neovasculogenesis, leading to relapse of oral cancer following radiation
Source: Sci Rep. 2016 Jun 8;6:27548. doi: 10.1038/srep27548 (PMC4897643; doi:10.1038/srep27548)
Supplement: Supplementary Information [file srep27548-s1.pdf]

## Supplementary information

### **M2-polarized macrophage contributes the neovascuogenesis, leading relapse of oral cancer following radiation**

Makiko Okubo<sup>1</sup>, Mitomu Kioi<sup>1\*</sup>, Hideyuki Nakashima<sup>1</sup>, Kei Sugiura<sup>1</sup>, Kenji Mitsudo<sup>1</sup>, Ichiro Aoki<sup>2</sup>, Hideki Taniguchi<sup>3</sup> & Iwai Tohnai<sup>1</sup>.

<sup>1</sup>Department of Oral and Maxillofacial Surgery, Yokohama City University Graduate School of Medicine, Yokohama, Kanagawa 236-0004, Japan.

<sup>2</sup>Department of Pathology, Yokohama City University Graduate School of Medicine, Yokohama, Kanagawa 236-0004, Japan.

<sup>3</sup>Department of Regenerative Medicine, Yokohama City University Graduate School of Medicine, Yokohama, Kanagawa 236-0004, Japan.

\*E-mail: [kioi@yokohama-cu.ac.jp](mailto:kioi@yokohama-cu.ac.jp)

#### Context of supplementary information

1. Supplementary Figures 1-5
2. Supplementary Table 1

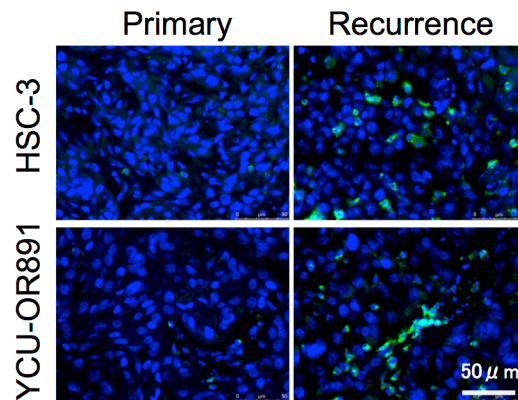

**Supplementary Figure S1.**

**The representative images of IHC for CD11b<sup>+</sup> myeloid cells in OSCC tumours before and after irradiation.** HSC-3 cells ( $1 \times 10^7$  cells) and YCU-OR891 cells ( $3 \times 10^6$  cells) were s.c. implanted on the back of female BALB/c nude mice, and grown tumours were irradiated in a manner similar to the OSC-19 model. Tumour samples were stained with CD11b antibody.

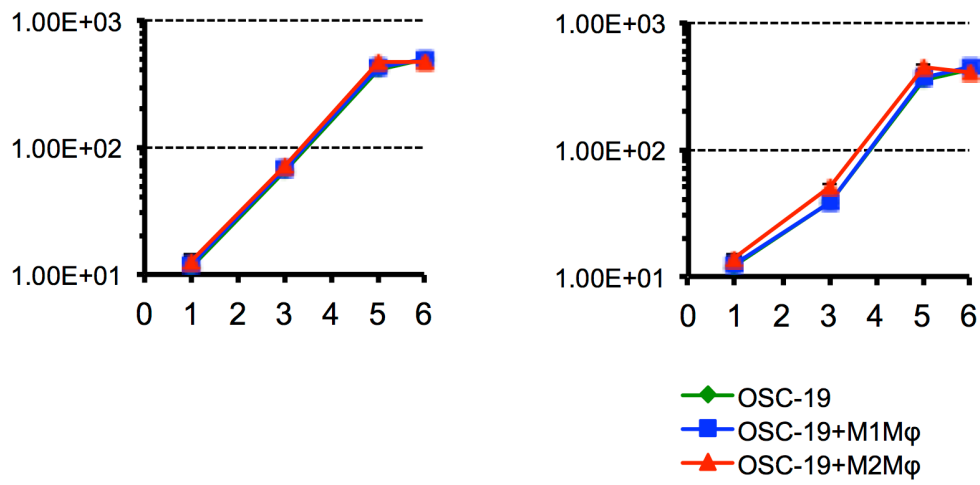

**Supplementary Figure S2.**

**Co-culture experiment of OSC-19-luc cells and BM-M1Mφs or BM-M2Mφs.**

OSC-19-luc cells ( $6 \times 10^3$  cells) were co-cultured with BM-M1Mφs or BM-M2Mφs (1.5 or  $6 \times 10^3$  cells) in 24 well plates in quadruplicate. Bioluminescent signals were determined using the IVIS system on indicated date. Data shown are means  $\pm$  SD.

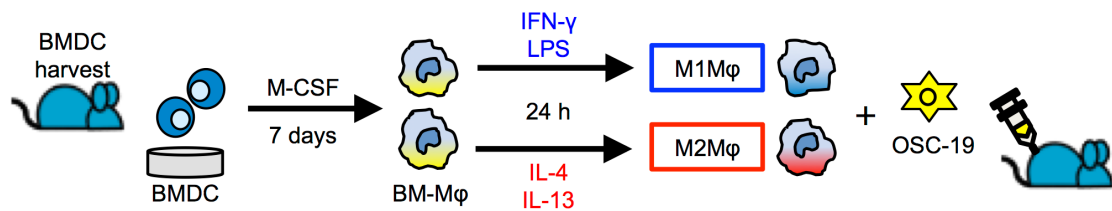

### Supplementary Figure S3.

**Pattern diagram of the experimental design for co-injection of OSC-19 cells and BM-M1Mφs or BM-M2Mφs.** OSC-19 cells were injected into non-IR or pre-IR sites alone or in the presence of BM-M1Mφs or BM-M2Mφs previously prepared *in vitro*.

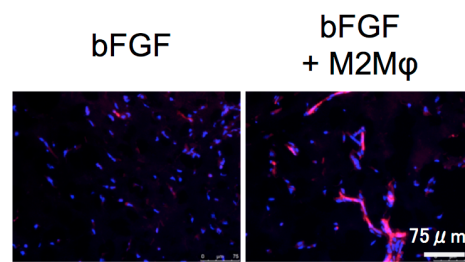

**Supplementary Figure S4.**

**Representative image of Matrigel Plug assay.** BM-M2Mφs promoted tube-like formation of CD31<sup>+</sup> endothelial cells (red) in Matrigel plug.

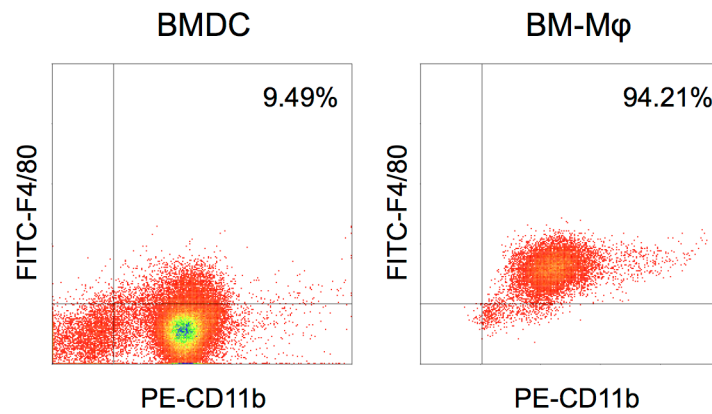

**Supplementary Figure S5.**

**FACS analysis of BMDCs and BM-Mφs.** FACS analysis showed that  $CD11b^{+}F4/80^{-}$  BMDCs harvested from BALB/c nude mice differentiated into  $CD11b^{+}F4/80^{+}$  BM-Mφs by extended culture with M-CSF for 7 days. BMDC, bone marrow-derived cell; BM-Mφs, bone marrow-derived macrophages; M-CSF, macrophage colony-stimulating factor.

|          | Forward 5' ⇒ 3'           | Reverse 5' ⇒ 3'           | Product length |
|----------|---------------------------|---------------------------|----------------|
| IL-6     | GACAAAGCCAGAGTCCTTCAGAGAG | CTAGGTTTGCCGAGTAGATCTC    | 228(bp)        |
| iNOS     | TTTGCTTCCATGCTAATGCCAAAG  | GCTCTGTTGAGGTCTAAAGGCTCCG | 600            |
| Arg I    | CAGAAGAATGGAAGAGTCAG      | CAGATATGCAGGGAGTCACC      | 249            |
| CD206    | GCAAATGGAGCCGTCTGTGC      | CTCGTGGATCTCCGTGACAC      | 300            |
| MMR      | AGCTACCATGGCATGAAGCAGAGA  | ACCCATTCTGAAGGCATTCCAGAGA | 464            |
| IL-13Rα2 | CGCATTTGTCAGAGCATTGT      | CCAAGCCCTCATACCAGAAA      | 216            |
| GAPDH    | TATGTCGTGGAGTCTACTGGT     | GAGTTGTCATATTCTCGT        | 149            |

**Supplementary Table S1.**

**Primer sequences specification for RT-PCR.**
